# Supplementary material for: A comparison of the diagnostic accuracy of MARS MRI and ultrasound of the painful metal-on-metal hip arthroplasty
Source: PubMed Central journal article supplement — Acta Orthop. 2014 Jul 14;85(4):375–82. doi: 10.3109/17453674.2014.908345 (PMC4105768; doi:10.3109/17453674.2014.908345), 2014-07-14
Supplement: ORT-85-375-s7013.pdf [file ORT-85-375-s7013.pdf]

## Supplementary article data

# A comparison of the diagnostic accuracy of MARS MRI and ultrasound of the painful metal-on-metal hip arthroplasty

Imran A Siddiqui<sup>1</sup>, Shiraz A Sabah<sup>1</sup>, Keshthra Satchithananda<sup>2</sup>, Adrian K Lim<sup>2</sup>, Suzie Cro<sup>3</sup>, Johann Henckel<sup>1</sup>, John A Skinner<sup>1</sup>, and Alister J Hart<sup>1</sup>

<sup>1</sup>Institute of Orthopedic and Musculoskeletal Science, <sup>2</sup>University College London, the Royal National Orthopedic Hospital, Brockley Hill, Stanmore; Department of Radiology, <sup>3</sup>Imperial College Healthcare NHS Trust, London; MRC Clinical Trials Unit, London, UK.  
Correspondence: a.hart@ucl.ac.uk, imran.a.siddiqui@gmail.com  
Submitted 13-11-25. Accepted 14-02-08

## Appendix A – STARD checklist for reporting of studies of diagnostic accuracy

The ‘Standards for the Reporting of Diagnostic accuracy studies’ (STARD) checklist, version Jan. 2003, was used to improve the accuracy and completeness of this report and facilitate the assessment of bias (internal validity) and generalizability (external validity).

### TITLE/ABSTRACT/KEYWORDS

- 1 Identify the article as a study of diagnostic accuracy (recommend MeSH heading ‘sensitivity and specificity’).  
Title – A Comparison of the Diagnostic Accuracy of MARS MRI and Ultrasound of the Painful Metal-On-Metal Hip Arthroplasty

### INTRODUCTION

- 2 State the research questions or study aims, such as estimating diagnostic accuracy or comparing accuracy between tests or across participant groups.  
Aim – To determine the [diagnostic accuracy] sensitivity and predictive values of USS compared to MARS MRI [gold standard reference] for the detection of pseudotumors and muscle atrophy.

### METHODS

#### Participants

- 3 The study population: The inclusion and exclusion criteria, setting and locations where data were collected.  
Population:
  - Patients with MOM hip replacements
 Inclusion (MHRA Guidance – MDA/2012/036):
  - Unilateral MOM hip patients with:
    - A large-diameter femoral head ( $\geq 36\text{mm}$ ) as either a resurfacing or stemmed component; a symptomatic MOM hip (Oxford Hip Score  $\leq 41/48$ )
  - AND a MARS MRI scan within one year

#### Exclusion:

- Bilateral MOM hip patients
- Follow-up less than 12 months postoperatively

#### Setting:

- A tertiary orthopedic referral center
- Patients attending the specialist MOM outpatient clinic

- 4 Participant recruitment: Was recruitment based on presenting symptoms, results from previous tests, or the fact that the participants had received the index tests or the reference standard?

Recruitment based on 1) having retrospectively received the reference standard (MARS MRI) within the past year or 2) based on eligibility for new investigation (prospective MARS MRI and USS).

- 5 Participant sampling: Was the study population a consecutive series of participants defined by the selection criteria in item 3 and 4? If not, specify how participants were further selected.

Consecutive series of 19 patients.

- 6 Data collection: Was data collection planned before the index test and reference standard were performed (prospective study) or after (retrospective study)?

Data collection was planned prior to the index test [USS]. A prospective study design was used.

#### Test methods

- 7 The reference standard and its rationale.  
At our center, MARS MRI is the current imaging gold-standard and has demonstrated good surgical correlation. Surgical validation is the ideal reference however this standard is not feasible for all patients as the majority is unlikely to undergo revision within the study time frame.
- 8 Technical specifications of material and methods involved including how and when measurements were taken, and/or cite references for index tests and reference standard.  
See Methods; MARS MRI and USS protocol.

- 9 *Definition of and rationale for the units, cut-offs and/or categories of the results of the index tests and the reference standard.*

See Appendix B; Classification of pseudotumors and muscle atrophy.

- 10 *The number, training and expertise of the persons executing and reading the index tests and the reference standard.*  
Two consultant musculoskeletal radiologists in consensus agreement.

- 11 *Whether or not the readers of the index tests and reference standard were blind (masked) to the results of the other test and describe any other clinical information available to the readers.*

Radiologists blinded to the clinical details and were blind (masked) to the results of the other test.

### Statistical methods

- 12 *Methods for calculating or comparing measures of diagnostic accuracy, and the statistical methods used to quantify uncertainty (e.g. 95% confidence intervals).*

Crosstab frequency tables used to calculate sensitivity, specificity, positive predictive value and negative predictive value.

95% confidence intervals calculated.

- 13 *Methods for calculating test reproducibility, if done.*

Test reproducibility not calculated. It was not appropriate to get one patient to have multiple scans.

## RESULTS

### Participants

- 14 *When study was performed, including beginning and end dates of recruitment.*

Over 6 months; recruitment from March – September 2012.

- 15 *Clinical and demographic characteristics of the study population (at least information on age, gender, spectrum of presenting symptoms).*

See Table 2; demographic and clinical data.

Population:

- Nineteen patients
- 15 females : 4 males
- Median age – 57 years
- 12 HRs : 7 THR
- Mean OHS 25/48
- Median time since primary op: 61 months

- 16 *The number of participants satisfying the criteria for inclusion who did or did not undergo the index tests and/or the reference standard; describe why participants failed to undergo either test.*

- Eight patients identified with retrospective MARS MRI declined to participate due to difficulty in commute and time constraints.
- All potential patients identified from clinic agreed to take part in this study.

### Test results

- 17 *Time-interval between the index tests and the reference standard, and any treatment administered in between.*

See Results. The mean time between MARS MRI and USS was 122 days (CI 69-156 days).

- 18 *Distribution of severity of disease (define criteria) in those with the target condition; other diagnoses in participants without the target condition.*

Pseudotumors: Disease was either present or absent.

Muscle Wasting: Disease was either present or absent.

In addition a grade one or more was classified as disease present.

- 19 *A cross tabulation of the results of the index tests (including indeterminate and missing results) by the results of the reference standard; for continuous results, the distribution of the test results by the results of the reference standard.*

See Appendix C.

- 20 *Any adverse events from performing the index tests or the reference standard.*

No adverse events reported.

Patients concerns and experience reported on a questionnaire. This includes claustrophobia for MARS MRI and pain (due to positions and transducer pressure) for the USS.

### Estimates

- 21 *Estimates of diagnostic accuracy and measures of statistical uncertainty (e.g. 95% confidence intervals).*

See Table 3; Ultrasound diagnostic test characteristics.

- 22 *How indeterminate results, missing data and outliers of the index tests were handled.*

Indeterminate results were either excluded or assumed as a negative test; as this often implies failure of the imaging to detect pathology adequately.

- 23 *Estimates of variability of diagnostic accuracy between subgroups of participants, readers or centers, if done.*

Unpublished data (Nishii 2012 AAOS Abstract) report a PPV, NPV and accuracy of 84%, 78% and 85% respectively for the detection of pseudotumors using USS. The better diagnostic accuracy maybe attributed to only anterior scans used for analysis; our study includes anterior, lateral and posterior scans; the posterior scans may be more inaccurate.

- 24 *Estimates of test reproducibility, if done.*

Reproducibility not possible.

### DISCUSSION

- 25 *Discuss the clinical applicability of the study findings.*

See discussion and conclusion.

Available online: <http://www.stard-statement.org/> [date accessed on 22 May 2012].

## Appendix B – Classification of pseudotumors and muscle atrophy using MARS MRI and ultrasound

The following grading system was used to classify pseudotumors and muscle atrophy on MARS MRI and ultrasound. MARS MRI pseudotumor classification (Hart et al. 2012) and MRI muscle atrophy classification (Bal and Lowe 2008).

Classification of pseudotumors and muscle atrophy using MARS MRI and ultrasound

|                |          | MARS MRI                                             |         | Ultrasound                                                                         |  |
|----------------|----------|------------------------------------------------------|---------|------------------------------------------------------------------------------------|--|
| Pseudotumors   | Type I   | Flat, thin-walled ( $\leq 2$ mm); fluid-like content | Type 1  | Cystic lesion: internal fluid echo-texture; flat, thin-walled                      |  |
|                | Type IIa | Thick-walled ( $> 2$ mm); fluid-like content         | Type 2  | Cystic lesion: internal fluid echo-texture; atypical fluid; irregular thick-walled |  |
|                | Type IIb | Thick-walled ( $> 2$ mm); atypical fluid             | Type 3  | Solid lesion: complex solid echo-texture                                           |  |
|                | Type III | Solid                                                |         |                                                                                    |  |
| Muscle atrophy | Grade 0  | No change                                            | Grade 0 | No change                                                                          |  |
|                | Grade 1  | Up to 30% reduction in muscle size                   | Grade 1 | Less than 30% size reduction or with some fatty replacement                        |  |
|                | Grade 2  | 30–70% fatty change and reduction in size            | Grade 2 | 30–70% size reduction with fatty replacement                                       |  |
|                | Grade 3  | $> 70\%$ fatty change with 80% reduction in size     | Grade 3 | $> 70\%$ size reduction with marked fatty replacement                              |  |

## Appendix C – Contingency frequency tables for statistical analysis

Note: the term ‘disease’ will be used to represent the pathology of interest being investigated in each case.

Contingency table. Gold standard test – MARS MRI

| Ultrasound                               | Grade 0 | Grade 1 | Grade 2 | Grade 3 | Total |
|------------------------------------------|---------|---------|---------|---------|-------|
| a) Gluteus medius muscle atrophy grading |         |         |         |         |       |
| Grade 0                                  | 0       | 6       | 3       | 1       | 10    |
| Grade 1                                  | 0       | 3       | 0       | 0       | 3     |
| Grade 2                                  | 0       | 2       | 1       | 1       | 4     |
| Grade 3                                  | 0       | 0       | 0       | 2       | 2     |
| Total                                    | 0       | 11      | 4       | 4       | 19    |
| b) Gluteus minimus atrophy grading       |         |         |         |         |       |
| Grade 0                                  | 1       | 3       | 4       | 2       | 10    |
| Grade 1                                  | 0       | 1       | 1       | 0       | 2     |
| Grade 2                                  | 0       | 2       | 0       | 1       | 3     |
| Grade 3                                  | 0       | 1       | 1       | 2       | 4     |
| Total                                    | 1       | 7       | 6       | 5       | 19    |
| c) Iliopsoas muscle atrophy grading      |         |         |         |         |       |
| Grade 0                                  | 14      | 0       | 0       | 0       | 14    |
| Grade 1                                  | 3       | 0       | 0       | 0       | 3     |
| Grade 2                                  | 2       | 0       | 0       | 0       | 2     |
| Grade 3                                  | 0       | 0       | 0       | 0       | 0     |
| Total                                    | 19      | 0       | 0       | 0       | 19    |

Diagnostic screening frequency table.

Gold standard test – MARS MRI

| USS test result                       | Disease | No disease | Total |
|---------------------------------------|---------|------------|-------|
| a) Pseudotumors                       |         |            |       |
| Positive                              | 9       | 1          | 10    |
| Negative                              | 4       | 5          | 9     |
| Total                                 | 13      | 6          | 19    |
| b) Gluteus medius muscle atrophy      |         |            |       |
| Positive                              | 9       | 0          | 9     |
| Negative                              | 10      | 0          | 10    |
| Total                                 | 19      | 0          | 19    |
| c) Gluteus minimus muscle atrophy     |         |            |       |
| Positive                              | 9       | 0          | 9     |
| Negative                              | 9       | 1          | 10    |
| Total                                 | 18      | 1          | 19    |
| d) Iliopsoas muscle atrophy           |         |            |       |
| Positive                              | 0       | 5          | 5     |
| Negative                              | 0       | 14         | 14    |
| Total                                 | 0       | 19         | 19    |
| e) Gluteus medius tendon abnormality  |         |            |       |
| Positive                              | 5       | 5          | 10    |
| Negative                              | 3       | 6          | 9     |
| Total                                 | 8       | 11         | 19    |
| f) Gluteus minimus tendon abnormality |         |            |       |
| Positive                              | 4       | 4          | 8     |
| Negative                              | 3       | 8          | 11    |
| Total                                 | 7       | 12         | 19    |
| g) Iliopsoas tendon abnormality       |         |            |       |
| Positive                              | 1       | 6          | 7     |
| Negative                              | 0       | 12         | 12    |
| Total                                 | 1       | 18         | 19    |

## Appendix D – Summary of pseudotumors identified using MARS MRI and ultrasound for each patient

Summary of pseudotumors identified using MARS MRI and ultrasound for each patient

| Patient number | Pseudotumors<br>(location as seen on) |                                  | Agreement                           |
|----------------|---------------------------------------|----------------------------------|-------------------------------------|
|                | MARS MRI                              | Ultrasound (USS)                 |                                     |
| 1              | None                                  | None                             | Yes                                 |
| 2              | Anterior<br>Lateral                   | None<br>Lateral                  | Yes                                 |
| 3              | Anterior<br>None                      | None<br>Lateral                  | Yes                                 |
| 4              | Anterior                              | Anterior                         | Yes                                 |
| 5              | None                                  | None                             | Yes                                 |
| 6              | Anterior<br>Posterior                 | Anterior<br>None                 | Yes                                 |
| 7              | Anterior<br>Lateral<br>None           | Anterior<br>Lateral<br>Posterior | Yes                                 |
| 8              | Anterior                              | Anterior                         | Yes                                 |
| 9              | Anterior                              | Anterior                         | Yes                                 |
| 10             | None<br>None                          | Anterior<br>Posterior            | No: MARS MRI missed anterior lesion |
| 11             | None                                  | None                             | Yes                                 |
| 12             | Lateral                               | None                             | No: USS missed lateral lesion       |
| 13             | None                                  | None                             | Yes                                 |
| 14             | Posterior                             | Posterior                        | Yes                                 |
| 15             | Lateral                               | None                             | No: USS missed lateral lesion       |
| 16             | Anterior                              | None                             | No: USS missed anterior lesion      |
| 17             | Lateral                               | None                             | No: USS missed lateral lesion       |
| 18             | None                                  | None                             | Yes                                 |
| 19             | Anterior                              | Anterior                         | Yes                                 |
